# Supplementary material
Source: Elsevier journal article supplement (https://www.sciencedirect.com/science/article/pii/S0014256521001582)
Supplement: mmc1 [file S0014256521001582:mmc1.pdf]

**Tabla complementaria 1.** Definiciones de las variables estudiadas.

| <b>DATOS EPIDEMIOLÓGICOS</b>                              |                                                                                                                                                                                                                                                                                                                                                                                     |
|-----------------------------------------------------------|-------------------------------------------------------------------------------------------------------------------------------------------------------------------------------------------------------------------------------------------------------------------------------------------------------------------------------------------------------------------------------------|
| <b>Edad</b>                                               | Diferencia de años (decimales) entre la edad en el momento de la inclusión y el año de nacimiento.                                                                                                                                                                                                                                                                                  |
| <b>Sexo</b>                                               | Hombre/Mujer                                                                                                                                                                                                                                                                                                                                                                        |
| <b>COMORBILIDAD</b>                                       |                                                                                                                                                                                                                                                                                                                                                                                     |
| <b>Hipertensión</b>                                       | Indica si el paciente está diagnosticado de hipertensión arterial, porque así consta en su historia clínica previa o está recibiendo tratamiento específico.                                                                                                                                                                                                                        |
| <b>Diabetes Mellitus</b>                                  | Indica si el paciente está diagnosticado de diabetes mellitus, porque así consta en su historia clínica previa o está recibiendo tratamiento específico.                                                                                                                                                                                                                            |
| <b>Cardiopatía isquémica</b>                              | Indica si el paciente está diagnosticado de cualquier tipo de cardiopatía isquémica (síndrome coronario agudo sin elevación del segmento ST, síndrome coronario agudo con elevación del segmento ST, angina inestable, angina estable, etc.), porque así consta en su historia clínica previa o está recibiendo tratamiento específico.                                             |
| <b>Enfermedad renal crónica</b>                           | Indica si el paciente está diagnosticado de insuficiencia renal crónica o enfermedad renal crónica, porque así consta en su historia clínica previa o si en análisis clínicos en el último año muestran creatininas séricas mayores de 2 mg/dL.                                                                                                                                     |
| <b>Enfermedad cerebrovascular</b>                         | Indica si el paciente está diagnosticado de enfermedad cerebrovascular o accidente cerebrovascular, porque así consta en su historia clínica previa o muestra informes en la tomografía computarizada o resonancia magnética en el último año de enfermedad cerebrovascular.                                                                                                        |
| <b>Fibrilación auricular</b>                              | Indica si el paciente está diagnosticado de fibrilación auricular crónica o permanente o en un electrocardiograma realizado durante un año previo muestre fibrilación auricular y continua hasta la actualidad.                                                                                                                                                                     |
| <b>Cardiopatía valvular</b>                               | Indica si el paciente está diagnosticado de cualquier tipo de cardiopatía valvular acorde con el ecocardiograma o estudio hemodinámico, porque así consta en su historia clínica previa.                                                                                                                                                                                            |
| <b>Enfermedad vascular periférica</b>                     | Indica si el paciente está diagnosticado de enfermedad arterial periférica en miembros inferiores o arteria carótida, o si el paciente está recibiendo tratamiento específico, o ha sido sometido a cirugía específica (bypass de extremidades inferiores, endarterectomía, etc.) o hay historia de un índice brazo-tobillo < 0,90 porque así consta en su historia clínica previa. |
| <b>Enfermedad pulmonar obstructiva crónica</b>            | Indica si el paciente está diagnosticado de enfermedad pulmonar obstructiva crónica porque así esté recogido en su historia clínica, tenga realizada una espirometría que no sea normal o está recibiendo tratamiento crónico con fármacos específicos.                                                                                                                             |
| <b>TRATAMIENTO FARMACOLÓGICO CRÓNICO PREVIO</b>           |                                                                                                                                                                                                                                                                                                                                                                                     |
| <b>Antagonistas de los receptores mineralocorticoides</b> | Reciben tratamiento crónico con antagonista de los receptores de la aldosterona.                                                                                                                                                                                                                                                                                                    |
| <b>Betabloqueantes</b>                                    | Reciben tratamiento crónico con betabloqueantes.                                                                                                                                                                                                                                                                                                                                    |
| <b>Inhibidores del sistema renina-angiotensina</b>        | Reciben tratamiento crónico inhibidores del sistema renina-angiotensina.                                                                                                                                                                                                                                                                                                            |
| <b>Diuréticos</b>                                         | Reciben tratamiento crónico con diurético.                                                                                                                                                                                                                                                                                                                                          |
| <b>TRATAMIENTO EN URGENCIAS</b>                           |                                                                                                                                                                                                                                                                                                                                                                                     |
| <b>Ventilación no-invasiva</b>                            | Recibe tratamiento con ventilación no-invasiva durante su valoración inicial en su estancia en urgencias y se describía si era en modo de CPAP ( <i>continuous positive airway pressure</i> ) o BiPAP ( <i>bilevel positive airway pressure</i> ).                                                                                                                                  |
| <b>Diuréticos intravenosos</b>                            | Recibe tratamiento con diuréticos en el servicio de Urgencias.                                                                                                                                                                                                                                                                                                                      |
| <b>Vasodilatadores intravenosos</b>                       | Recibe tratamiento con vasodilatadores intravenosos durante su valoración inicial en su estancia en Urgencias.                                                                                                                                                                                                                                                                      |
| <b>DESTINO</b>                                            |                                                                                                                                                                                                                                                                                                                                                                                     |
| <b>Ingreso hospitalario</b>                               | El paciente es transferido a una sala de hospitalización de cualquier tipo (unidad de cuidados críticos, coronarios, cuidados intermedios, medicina interna, cardiología, unidad de corta estancia, geriatría, subagudos o unidades de crónicos, etc.) .                                                                                                                            |
| <b>MORTALIDAD</b>                                         |                                                                                                                                                                                                                                                                                                                                                                                     |
| <b>Mortalidad a los 30 días por cualquier causa</b>       | Muerte durante un período de 30 días desde su alta en Urgencias o desde su ingreso por cualquier causa.                                                                                                                                                                                                                                                                             |
| <b>CONGESTIÓN</b>                                         |                                                                                                                                                                                                                                                                                                                                                                                     |
| <b>Disnea de esfuerzo</b>                                 | Presencia de disnea a grandes, moderados o leves esfuerzos.                                                                                                                                                                                                                                                                                                                         |
| <b>Crepitantes pulmonares</b>                             | Presencia de crepitantes pulmonares en más ambas mitades inferiores de                                                                                                                                                                                                                                                                                                              |

|                                     |                                                                                                                                                                                                                                    |
|-------------------------------------|------------------------------------------------------------------------------------------------------------------------------------------------------------------------------------------------------------------------------------|
|                                     | ambos hemitórax.                                                                                                                                                                                                                   |
| <b>Ortopnea</b>                     | Aparición de disnea en decúbito supino, obligándole a mantener una postura en sedestación.                                                                                                                                         |
| <b>Disnea paroxística nocturna</b>  | Aparición de una crisis de disnea de reposo por la noche y que despierta al paciente.                                                                                                                                              |
| <b>Edema en miembros inferiores</b> | Presencia de edema con fóvea más allá de la zona tibio-maleolar.                                                                                                                                                                   |
| <b>Ingurgitación yugular</b>        | Presencia de una presión venosa a más 4 cm por encima del ángulo esternal o de Louis. Medida con el paciente a 45° y valorada vena yugular interna derecha y estimada por el punto más alto de oscilación, y medido con una regla. |
| <b>Hepatomegalia</b>                | Presencia de un borde hepático palpable por debajo del reborde costal.                                                                                                                                                             |
